# Supplementary material
Source: PubMed Central journal article supplement (PMC5818157)
Supplement: NIHMS941032-supplement-Appendix.pdf [file NIHMS941032-supplement-Appendix.pdf]

# Combined Sewer Overflow Events and Childhood Emergency Department Visits: A Case-Crossover Study

*Cole Brokamp, Andrew Beck, Louis Muglia, Patrick Ryan*

## Supplementary Information

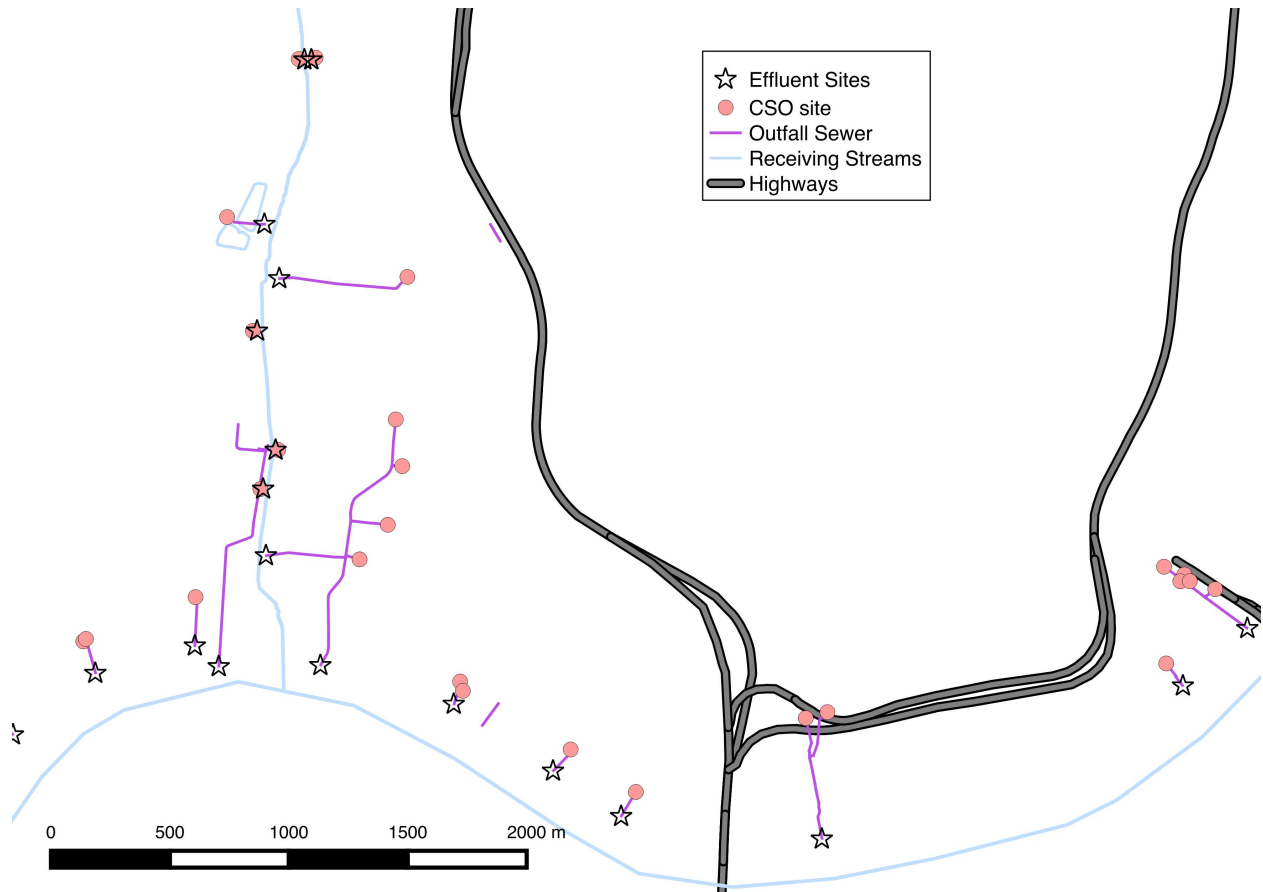

Figure 1: Each CSO site was linked to an effluent point where the combined sewer overflow was released into a receiving stream by using the location of outfall sewer pipes. Here is an example of the process using CSO sites in downtown Cincinnati, OH, USA.

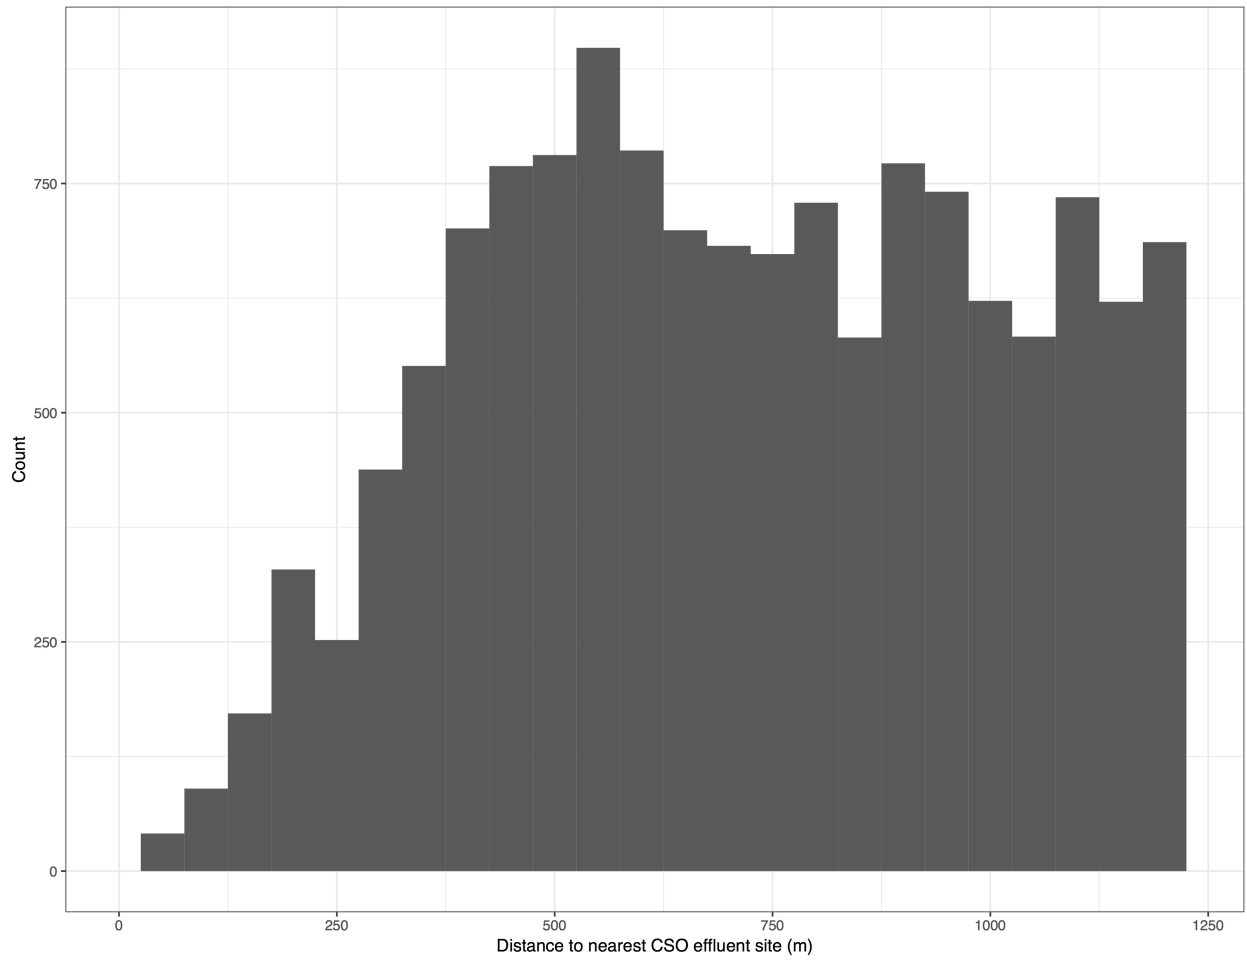

Figure 2: A histogram of the ED visits by distance to the nearest CSO effluent site in meters. Each bin represents 50 m.

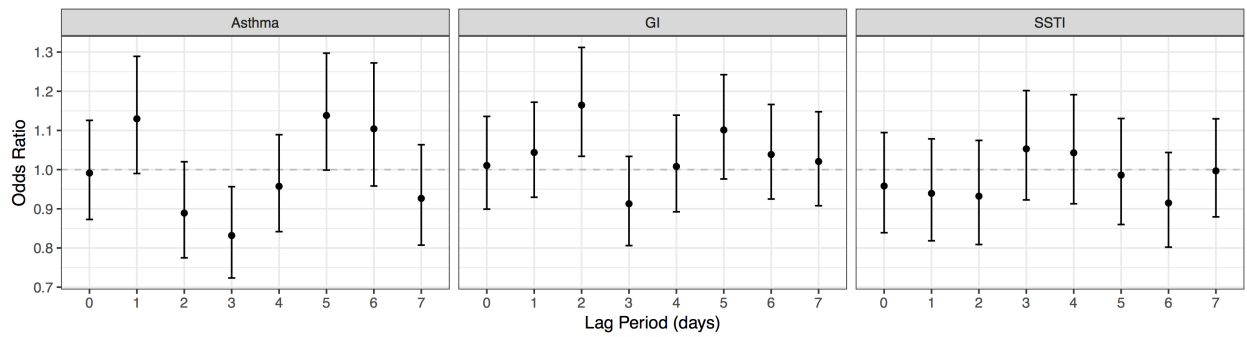

Figure 3: A sensitivity analysis of the conditional logistic regression model describing the odds of an ED visit with the increase of one CSO event controlling for daily temperature and relative humidity.
